# Supplementary material for: Co-occurrence of resistance genes to antibiotics, biocides and metals reveals novel insights into their co-selection potential
Source: PubMed Central journal article supplement (PMC4650350; doi:10.1186/s12864-015-2153-5), 2015-11-17
Supplement: 12864_2015_2153_MOESM5_ESM.pdf [file 12864_2015_2153_MOESM5_ESM.pdf]

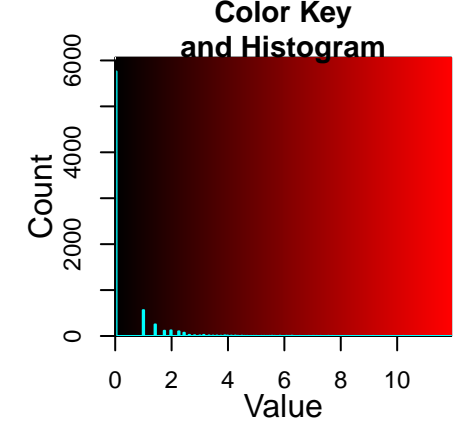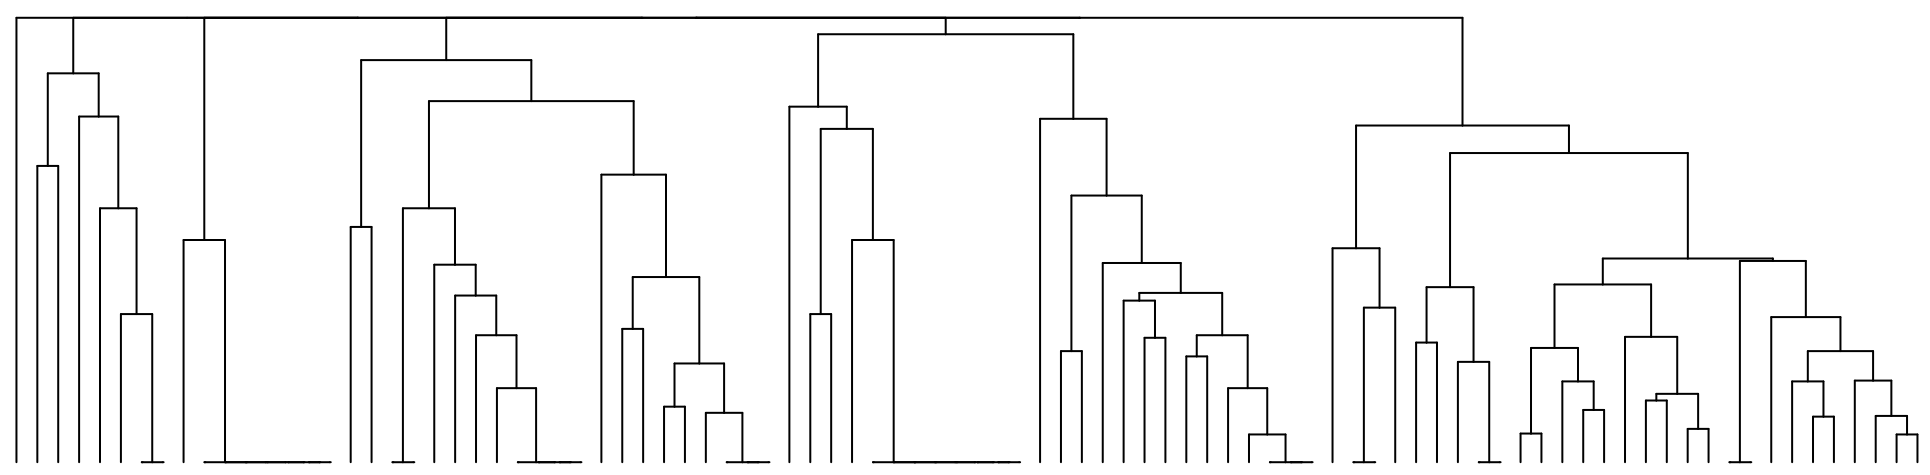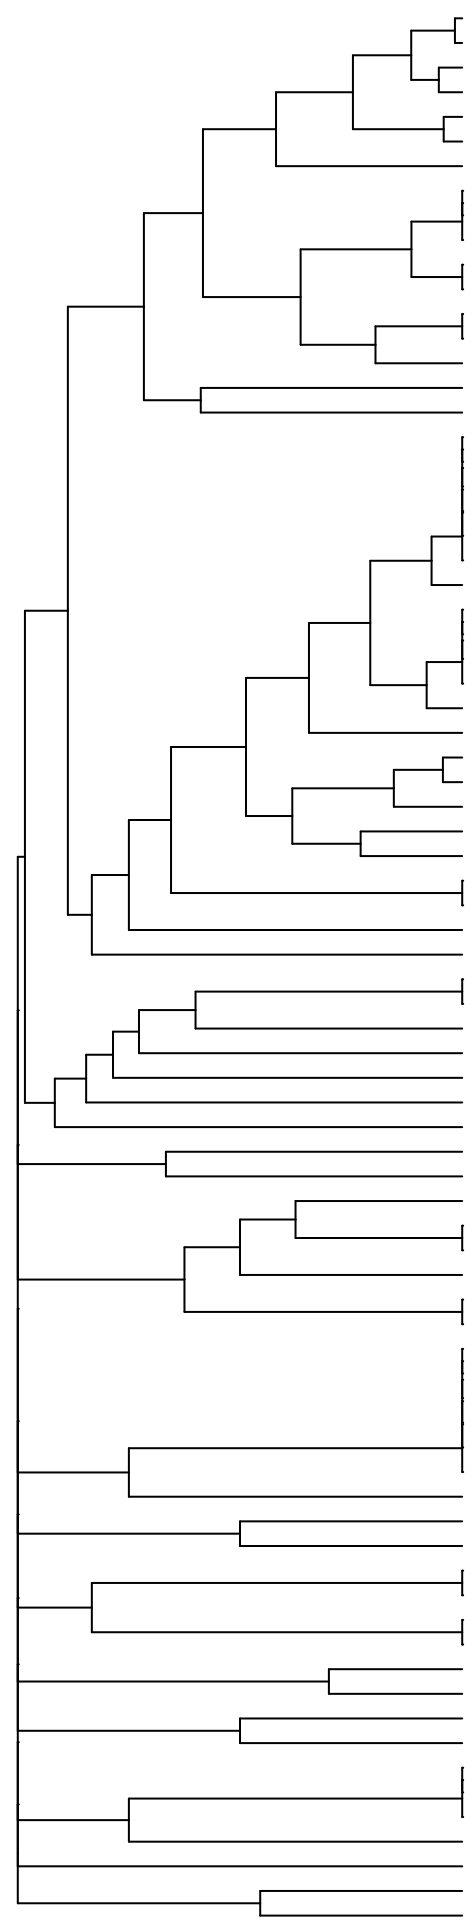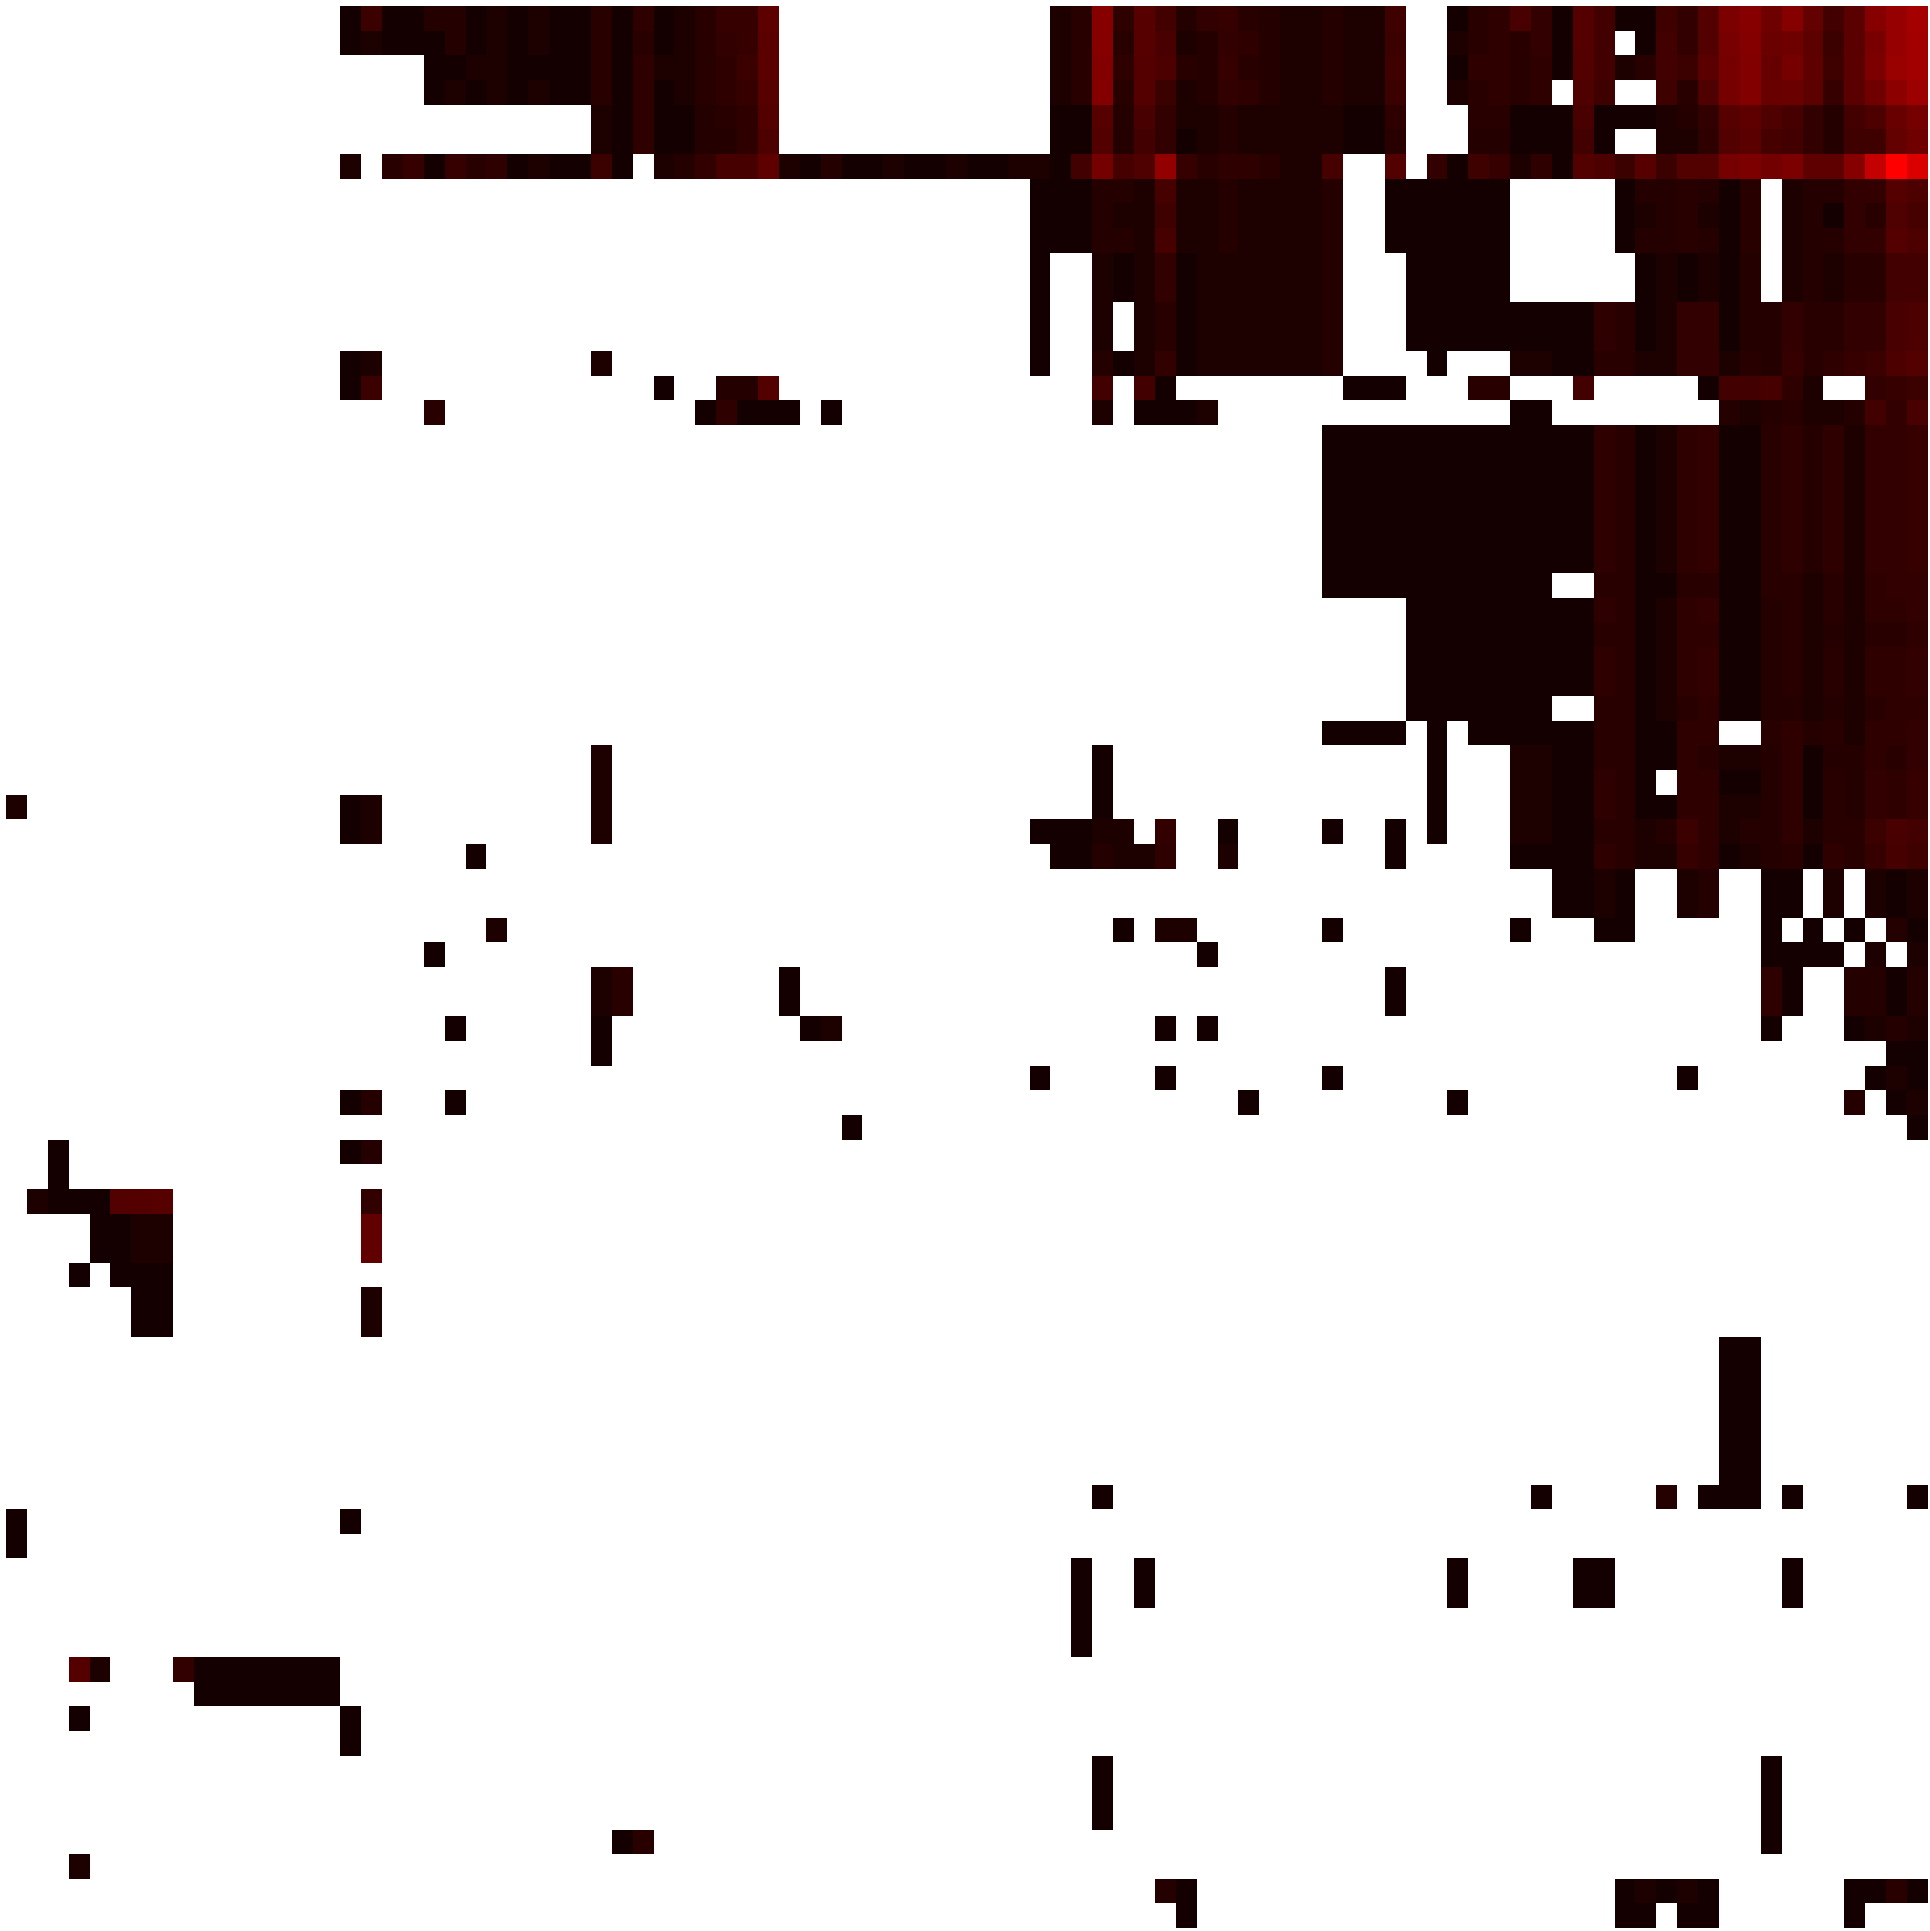

- merA
- merT
- merR
- merP
- merD
- merE
- qacEdelta1
- terC
- terB
- terD
- terZ
- terW
- pcoS
- pcoE
- arsC
- merB
- qacF
- silB
- silA
- silC
- silP
- silR
- silS
- silE
- pcoA
- pcoC
- pcoD
- pcoR
- pcoB
- silF
- arsD
- arsA
- arsB
- arsR
- arsH
- fecE
- fecD
- ydeI
- PA0320
- klaC/telB
- klaB/telA/kilB
- mmR
- abeS
- rcnR/yohL
- merR1
- qacE
- cadC
- merB3
- cadD
- qacR
- qacA
- qacG
- csoR
- copA
- chrB
- chrA
- chrC
- mexC
- mexD
- oprJ
- corA
- copB
- copY/tcrY
- oqxB
- oqxA
- nrsD/nreB
- copC
- qacC/qacD/smr
- fetB/ybbM
- qacH/qacI
- mco
- ybtP
- mdeA
- ybtQ
- merF
- qacJ
- terE
- terA

- tet(W)
- erm(T)
- tet(K)
- smr/qac/abr
- dfrC
- aph(3)-IIIa
- mph(C)
- mis(A)
- ant(4)-Ia
- vanZA
- vanYA
- vanXA
- vanSA
- vanRA
- vanA
- vanHA
- erm(B)
- qacAB
- qnrA
- aph(3)-Via
- sul3
- OXA-10
- aac(3)-Ia
- DHA
- tet(E)
- mph(B)
- catA13
- dfrA7/dfrA17/dfrA32
- OXA-2
- aph(3)-Ib
- ISCR8
- dfrA10
- aac(6)-II
- VIM
- cmlA
- ant(2)-Ia
- CMY2
- aac(3)-Ib
- aac(6)-33/I30
- GES
- dfrB2/dfrB3/dfrB7
- tet(G)
- tet(33)
- qspA
- inu(F)
- aac(6)-Iae
- ISCR3
- CAR
- ISCR14
- CMY1
- qnrS
- aac(3)-IIa/IIc
- sul2
- mph(E)
- ISCR2
- ISCR1
- qnrB
- catA2
- SHV
- IMP
- tet(D)
- aac(6)-IIC
- dfrA18
- catB2/catB3/catB10
- aac(3)-IVa
- aph(4)-Ia
- dfrA1/dfrA15
- aph(6)-Ic
- tet(C)
- aph(3)-IIa
- ISCR5
- aac(3)-Via
- KPC
- dfrA5/dfrA14/dfrA25/dfrA30
- VEB
- lor
- mph(A)
- OXA-1
- NDM
- tet(B)
- CTX-M
- catA1
- aph(3)-Ib
- aph(6)-Id
- tet(A)
- TEM
- aph(3)-Ia
- dfrA12/dfrA13/dfrA21/dfrA22/dfrA33
- aac(6)-Ib
- ant(3)-Ia
- sul1
- int1
