# Supplementary material for: Co-occurrence of resistance genes to antibiotics, biocides and metals reveals novel insights into their co-selection potential
Source: PubMed Central journal article supplement (PMC4650350; doi:10.1186/s12864-015-2153-5), 2015-11-17

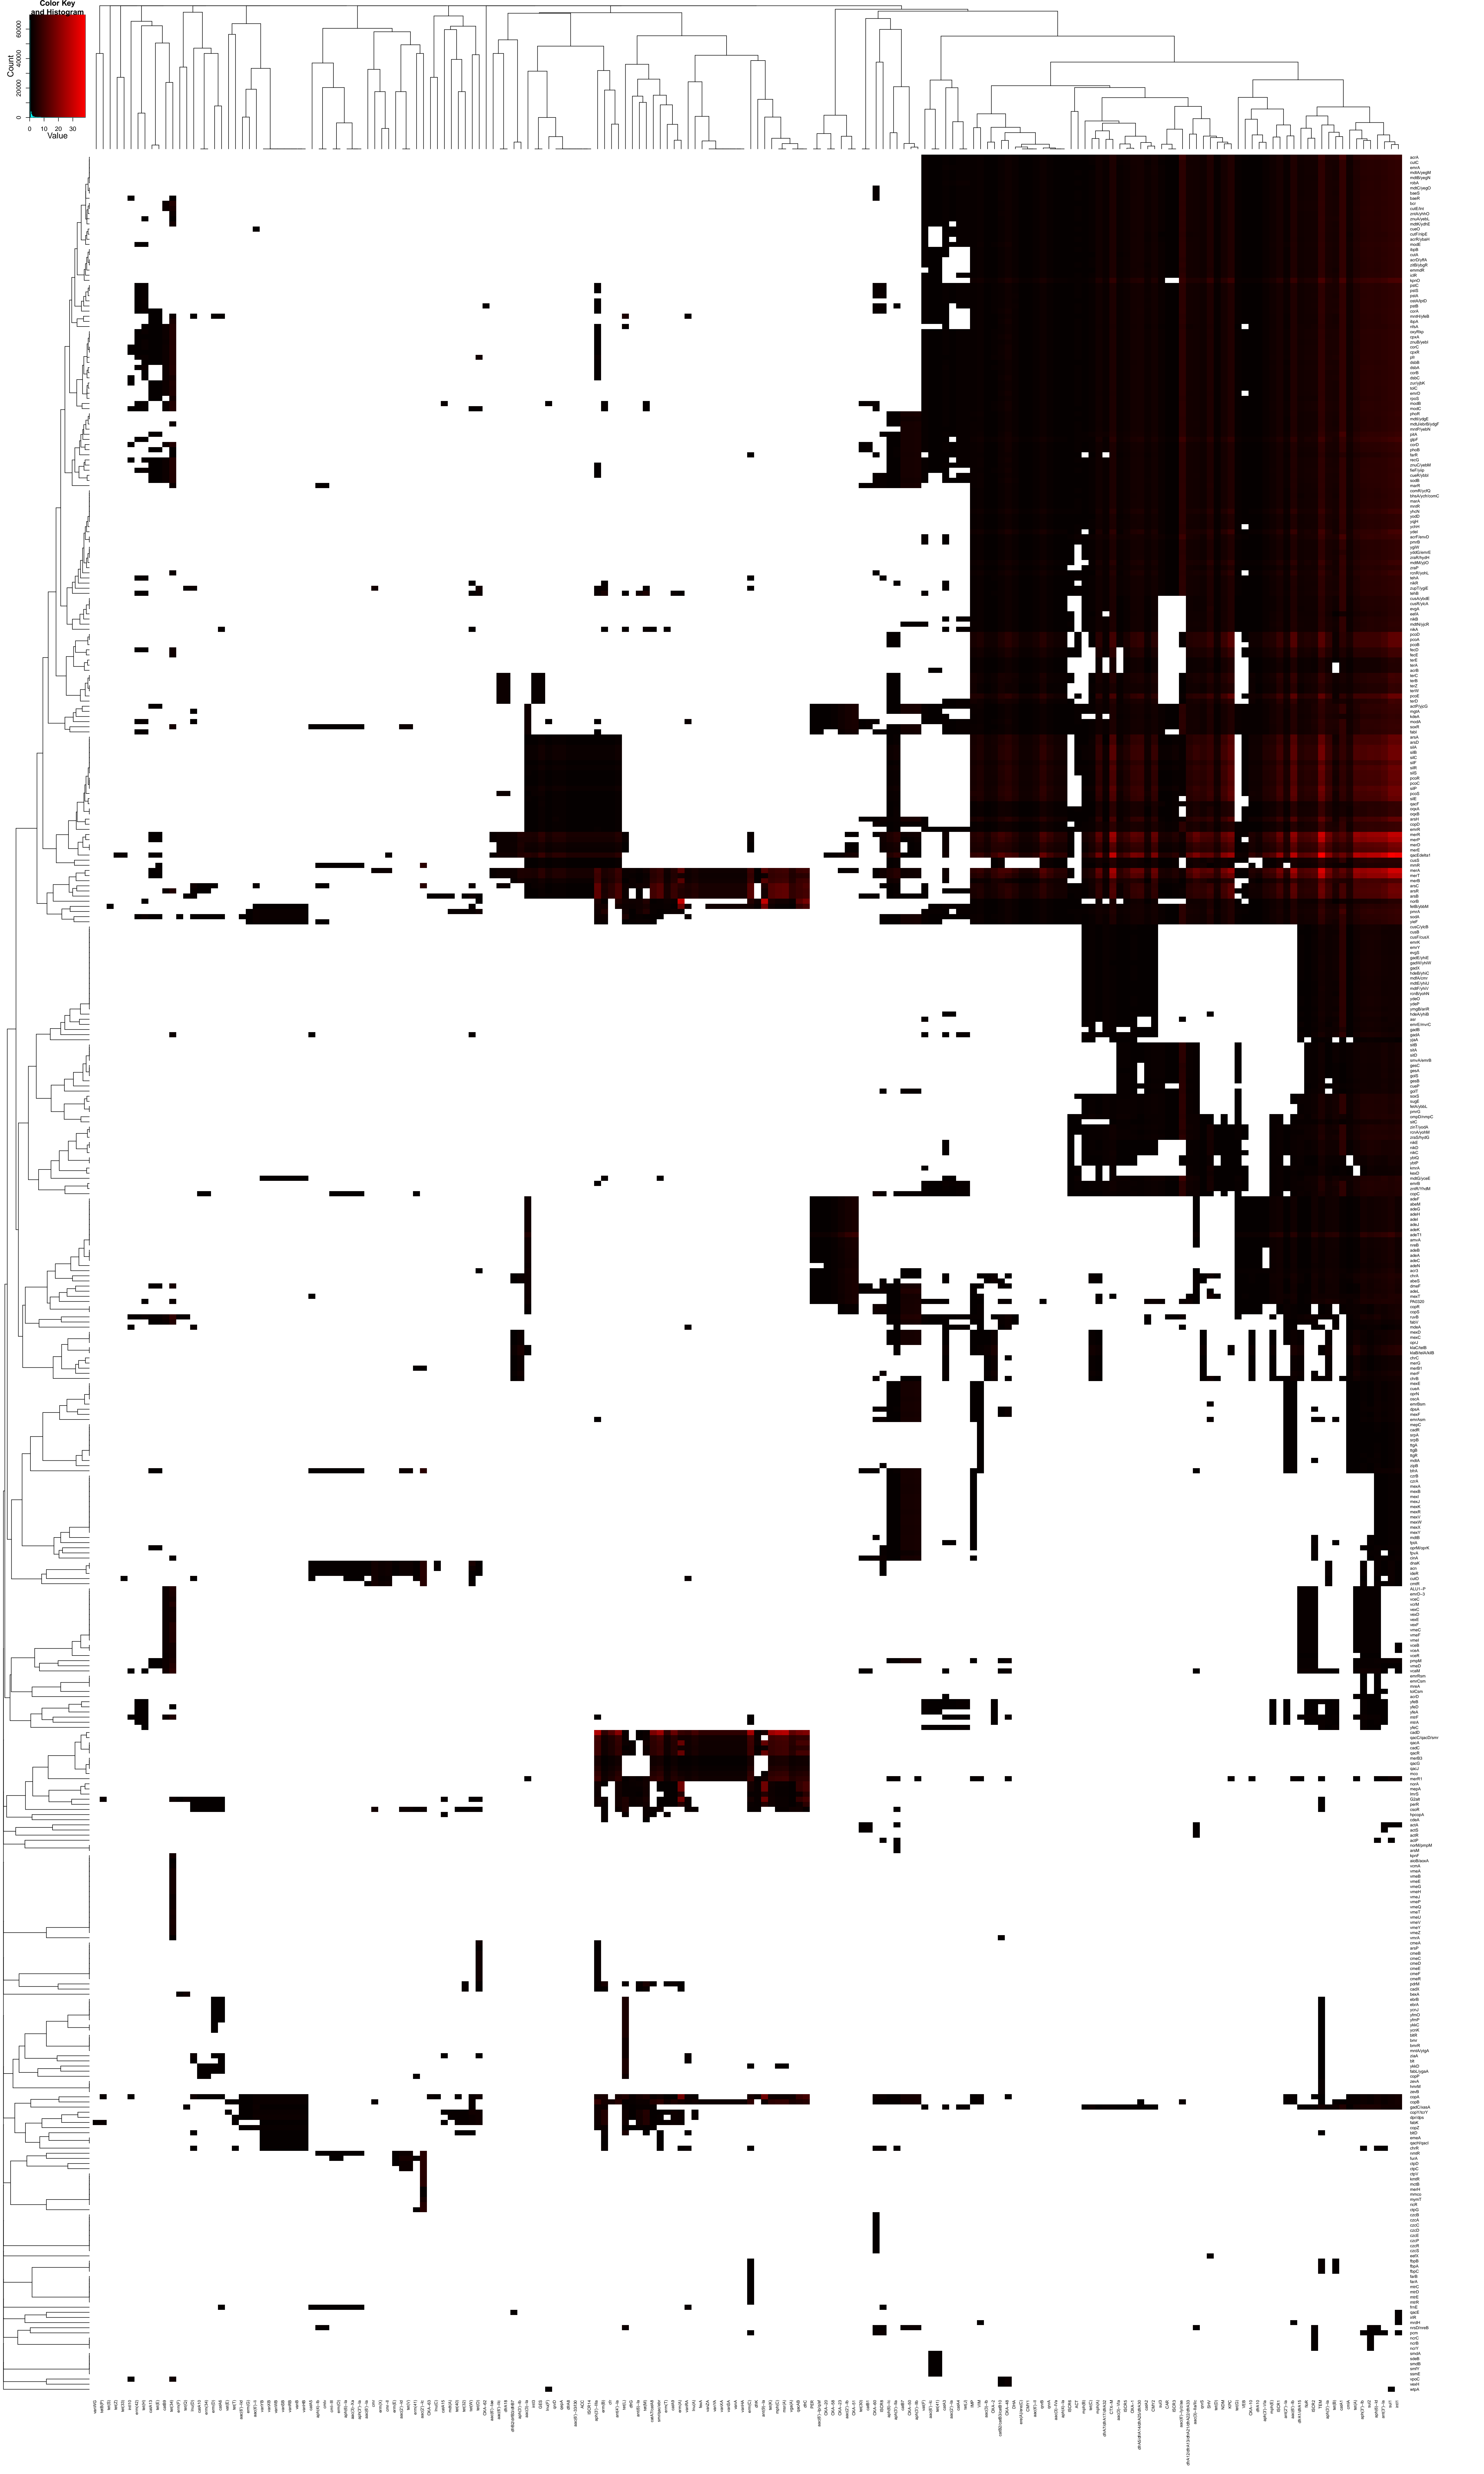

Supplement: 12864_2015_2153_MOESM6_ESM.pdf [file 12864_2015_2153_MOESM6_ESM.pdf]
